# Supplementary material
Source: PubMed Central journal article supplement (PMC9894376)
Supplement: NIHMS1568889-supplement-1.pdf [file NIHMS1568889-supplement-1.pdf]

**S1 Table. RT-PCR primers**

| Antibody       | Vendor | Cat.#   | Dilution |
|----------------|--------|---------|----------|
| E-cadherin     | Abcam  | Ab15148 | 1:1000   |
| N-cadherin     | Abcam  | Ab18203 | 1:1000   |
| MMP-2          | CST    | D4K9N   | 1:2000   |
| $\alpha$ -SMA  | CST    | D4M2N   | 1:1000   |
| $\beta$ -actin | CST    | 8H10D10 | 1:5000   |

**S2 Table. RT-PCR primers**

| Genome        | Target Gene      | Amplicon (bp) | Tm | F Primer 5'-3'            | R Primer 3'-5'         |
|---------------|------------------|---------------|----|---------------------------|------------------------|
| Mitochondrial | tRNA-Leu (UUR)   | 107           | 62 | CACCCAAGAACAGGGTTTGT      | TGGCCATGGGTATGTTGTTA   |
| Nuclear       | B2-Microglobulin | 86            | 62 | TGCTGTCTCCATGTTTGATGTATCT | TCTCTGCTCCCCACCTCTAAGT |

## Supplementary Figure 1

A.

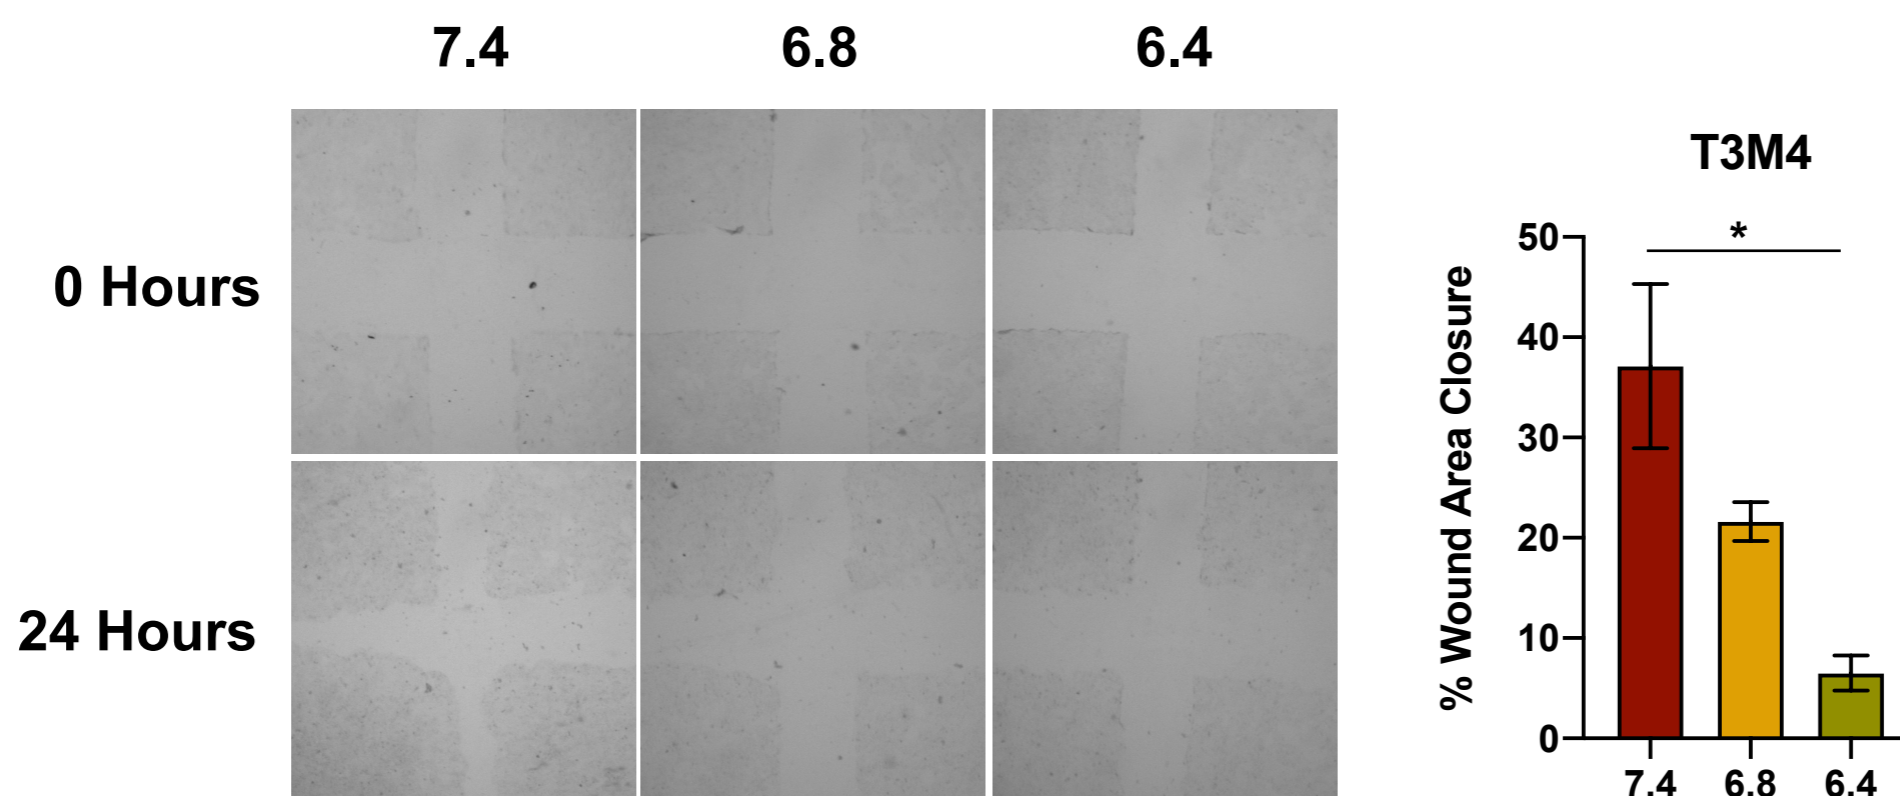

B.

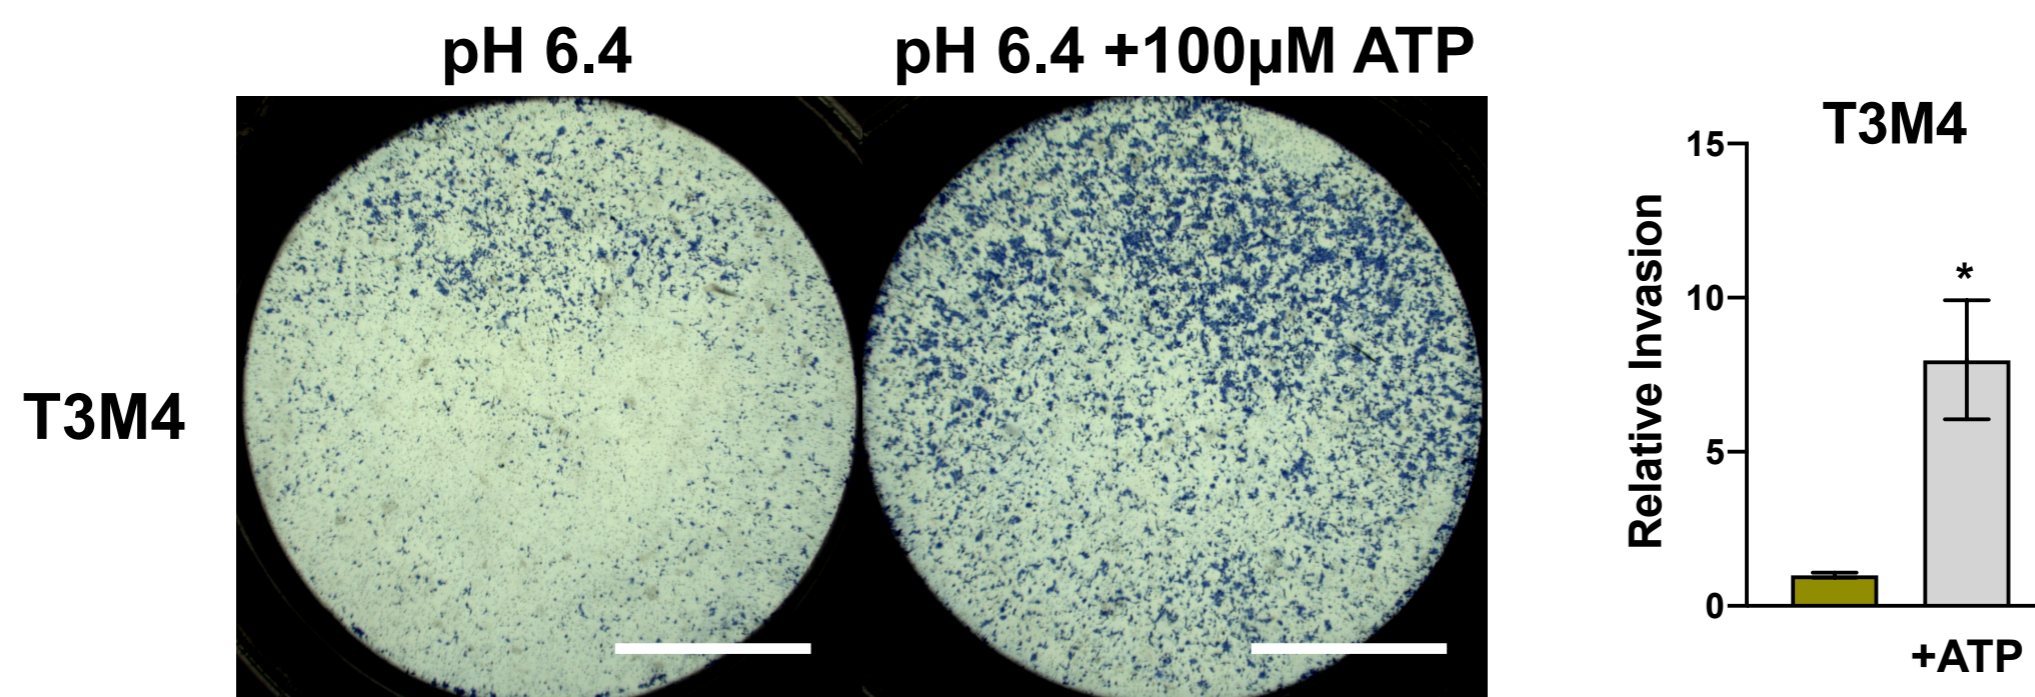

**Supplementary Figure 1.** (A) Left – Representative images from a scratch assay. T3M4 cells were grown to confluency on a 24-well plate. Following the creation of two perpendicular scratches, wells were replaced with the indicated pH media. Images were taken immediately and after 24-hour incubation with EVOS imaging system. Right – Area of the wound before and after incubation was measured with ImageJ software (n=2) (B) Left – Representative images from Matrigel invasion assays. Suspension of T3M4 cells in pH 6.4 media was added into the inserts and incubated with and without 100μM ATP. Bar, 2000μm. Right - Quantification of relative invasion (n=2). Data are shown as mean  $\mu \pm$  SD. \*p < 0.05
